1 **Title:** Real-world evidence: telemedicine for complicated cases of urinary tract infection

2

3 **Running Title:** RWE for telemedicine and complicated UTI

4

5 **Authors:**

6 Natalie M. Daumeyer<sup>1</sup>, Daniel Kreitzberg<sup>1</sup>, Kathleen M. Gavin<sup>1,2</sup>, Timothy A. Bauer<sup>1,2,\*</sup>

7

8 <sup>1</sup>Everly Health, Inc., Austin, TX, USA

9 <sup>2</sup>University of Colorado Anschutz Medical Campus, Aurora, CO, USA

10

11 \*Corresponding author

12 Email: [tbauer@everlyhealth.com](mailto:tbauer@everlyhealth.com)

13

14 References: 40

15 Tables: 4

16 Figures: 2

17 Appendices: 1

18 Article text: 3,366 words, not including title page, abstract, references, tables, figures, or  
19 appendices

20 Abstract: 265 words

21 Key words: antibiotic compliance; cystitis; telehealth; telemedicine; urinary tract infections

22

23 Abbreviations:

24 STIs, sexually transmitted infections; UTIs, urinary tract infections

25

26

27 **Abstract**

28 **Background:** Telemedicine programs for the treatment of urinary tract infections (UTIs) offer an

29 opportunity to reduce burdens on patients and providers. However, these programs are typically

30 restricted to patients with uncomplicated UTIs. This real-world analysis evaluated treatment and  
31 resolution rates in a large-scale, national UTI telemedicine program inclusive of patients with  
32 uncomplicated and complicated UTIs.

33 **Methods and findings:** We conducted a retrospective analysis of data obtained from a  
34 commercially available telemedicine program for the treatment of UTIs among adult women in  
35 the US between 2017 and 2021 (n=51,474). The primary outcomes were the number of women  
36 who presented with symptoms of uncomplicated UTI, complicated UTI, and vaginal infection;  
37 prescription use and antibiotic type; symptom resolution within 7 days after appointment; and  
38 treatment failure or relapse. Most patients reported frequent urination (94.4%), urgency (94.5%),  
39 and dysuria (97.6%). Those with uncomplicated UTI symptoms represented the majority of  
40 patients (61.6%); however, a substantial number of patients (36.5%) also reported at least 1  
41 symptom associated with a complicated UTI. One-fifth of patients (19.2%) reported at least 1 co-  
42 occurring symptom of vaginal infection or sexually transmitted infection. Across all treated  
43 patients, 94.0% received recommended antibiotics according to the clinical protocol. Of the  
44 treated patients who provided follow-up data (n=3,521), 89.7% reported 7-day symptom  
45 resolution. Symptom resolution rates were similar between patients with uncomplicated UTI  
46 symptoms (90.8%) and complicated UTI symptoms (87.9%), and symptom resolution among all  
47 treated patients (89.7%) was similar to reports for in-person standard of care.

48 **Conclusions:** These findings suggest that large-scale telemedicine programs for the treatment of  
49 UTIs can be effective in the treatment of complicated UTIs.

50

## 51 **Introduction**

52 Urinary tract infections (UTIs) are some of the most common infections, accounting for millions  
53 of visits to healthcare facilities every year [1]. The use of urinalysis in emergency departments to  
54 diagnose suspected UTIs has increased from 23% in 2007 to 27% in 2016 [2]. During these  
55 visits, patients can spend more than 2 hours waiting for and receiving care, creating a burden for  
56 patients [3]. Using telemedicine as an alternative model of care for patients with UTIs would  
57 reduce the amount of time patients spend seeking treatment, while freeing up important resources  
58 in often over-burdened urgent care and emergency departments, as well as primary care clinics  
59 [4,5]. UTIs make up 0.7% of outpatient services, according to projections from US registries [1].  
60 Between 1996 and 2001, an average of 7 million women visited healthcare centers in the US for  
61 uncomplicated UTIs [6]. There were 10.5 million ambulatory visits for UTIs in the US in 2007  
62 (accounting for approximately 1% of all ambulatory visits), of which, 21.3% were to emergency  
63 departments [7]. Consultations for UTIs represent between 1% and 6% of all medical visits  
64 (~7 million visits and ~\$1.6 billion annually) [8]. Previous research has shown that  
65 telemedicine treatment programs are effective for women presenting with uncomplicated UTI  
66 symptoms [9-15]. These programs, which largely rely on the application of inclusion/exclusion  
67 criteria according to self-reported symptoms and empirical use of antibiotics [16], are similar to  
68 in-person care and reduce time to recovery compared with diagnosis using urinalysis [16,17].  
69 However, a limitation of these programs is the exclusion of patients who self-reported symptoms  
70 of complicated UTIs (e.g., fever, nausea) or vaginal infections (e.g., vaginal discharge, vaginal  
71 irritation) [9,11-14]. Thus, it is unclear how effective or safe telemedicine programs can be for  
72 patients with these clinical profiles.

73 Women with symptoms of complicated UTIs (e.g., pyelonephritis) are usually referred to  
74 in-person care to receive intravenous antibiotics and/or undergo urinalysis to determine the  
75 appropriate antibiotic regimen [18,19]. However, some complicated UTI cases can be managed  
76 at home without admittance to an emergency department. Researchers have thus begun to  
77 question whether higher-risk patients, such as those who report symptoms of pyelonephritis or  
78 more complicated UTI, can be treated via telemedicine [15,18,20].

79 In a similar manner, women with vaginal symptoms are often referred to in-person care  
80 to rule out other diagnoses, such as sexually transmitted infections (STIs) and vaginal infections  
81 [16,21,22]. However, even cases of suspected STI may be managed by remote sample collection  
82 and telemedicine services [23]. Recent evidence has shown that vaginal discharge does not  
83 reduce the likelihood of a UTI [24], contradicting earlier studies advocating for in-person  
84 treatment for women with vaginal symptoms [16]. Thus, with proper symptom screening, which  
85 can be implemented virtually, a process for ruling in or out vaginal infections and STIs may be  
86 accomplished [25]. Patients with symptoms of complicated UTI or vaginal infection may benefit  
87 from a telemedicine approach to care, but current studies evaluating the value of telemedicine  
88 have excluded these patients. It remains unknown whether telemedicine provides an alternative,  
89 effective pathway to care without compromising on quality.

90 This study examined real-world data from a large telemedicine program that sought to  
91 provide treatment for women with UTI symptoms. This UTI telemedicine program is different  
92 from previously evaluated programs [15] in the following ways: 1) symptoms reported during  
93 the initial screening are included, 2) patients who reported symptoms of complicated UTI and  
94 vaginal infection were included, and 3) physicians were given discretion as to whether and how  
95 to treat women who reported symptoms of complicated UTI or vaginal infection. The primary

96 outcome measures were the number of women who presented with symptoms of uncomplicated  
97 UTI, complicated UTI, and vaginal infection; prescription use and antibiotic type; symptom  
98 resolution within 7 days after appointment; and treatment failure or relapse.

99

## 100 **Methods**

### 101 *Ethics*

102 This study is a retrospective analysis of real-world data from a nationwide commercial  
103 telemedicine program for the treatment of UTIs. The project was deemed exempt from IRB  
104 review by WCG Institutional Review Board (IRB00000533) because it does not meet the  
105 definition of human subjects research as defined in federal regulation 45 CFR 46.102.

106

### 107 *Study population and data collection*

108 Individuals in the US seeking care for UTI symptoms between November 2017 and November  
109 2021 completed a digital screening process to determine their eligibility for telemedicine  
110 services. Patients were excluded for the following reasons: younger than 18 years of age, male,  
111 pregnant or breastfeeding, immunocompromising conditions (e.g., HIV, lupus), history of kidney  
112 condition, history of urinary condition, history of urologic procedure, history of resistant  
113 organisms, or inpatient stay at a healthcare facility within the past 3 months. For this protocol,  
114 prior to the COVID-19 pandemic, women aged 65 years or older were excluded if they were  
115 currently taking more than 5 prescription medications; this contraindication was removed during  
116 the pandemic because of restricted access to in-person care. Cancelled/missed appointments,  
117 duplicate records, and follow-up appointments occurring within 30 days after the initial  
118 appointment were excluded from the analysis set. Those meeting the criteria reported their

119 symptoms through the digital screener and scheduled a telemedicine consultation. Patients who  
120 reported symptoms of a complicated UTI or vaginal infection were able to schedule a  
121 telemedicine consultation. Immediately following their consultation, patients received a  
122 satisfaction questionnaire. After 7 days, patients received a follow-up questionnaire to assess  
123 their symptom resolution. All patients who reported unresolved symptoms received follow-up  
124 telemedicine services. Fig 1 shows the participant selection process for this cohort study.  
125

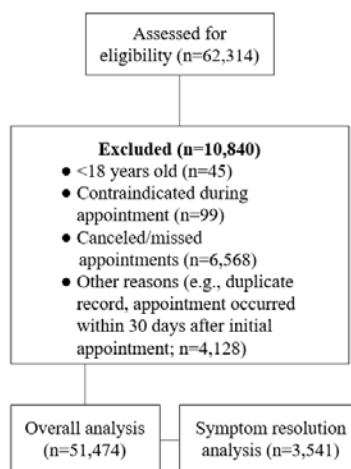

126

127

**Fig 1.** Study flow chart

128

### 129 *Physician information and the clinical protocol*

130 The median number of consultations was 79 (IQR=623) among 84 physicians. Physician  
131 specialties varied and included 51.2% (n=43) family medicine, 29.8% (n=25) internal medicine,  
132 11.9% (n=10) emergency medicine, and 4.8% (n=4) preventative medicine, as well as 1  
133 physician who was trained in both internal and emergency medicine and 1 physician who was  
134 trained as a radiologist. A clinical protocol provided guidance for physicians to diagnose and  
135 treat uncomplicated UTIs using the telemedicine platform. The protocol outlined

136 contraindications, considerations for treatment, and recommended antibiotic regimens (see S1  
137 Appendix) [18,22,26]. All physicians were trained on the protocol, which was available for  
138 reference during consultations. The protocol recommended that patients with symptoms of  
139 complicated UTIs or vaginal infection be referred to in-person care. However, physicians were  
140 permitted to use their discretion to treat via telemedicine or refer to in-person care. STIs were  
141 ruled out during physician consultation based on answers provided on the questionnaire. If  
142 providers were unsure about treating a patient, they could escalate the issue to the telemedicine  
143 program directors for additional guidance.

144

#### 145 *Measures*

146 *Demographic characteristics.* Patients were asked their age (in years) and sex during the  
147 digital screening process before the UTI consultation. The first 3 digits of each patient's zip code  
148 were used to determine geographic location.

149 *Symptom presentation groups.* Patients reported the presence of the following 4  
150 uncomplicated UTI symptoms: urinary frequency, urinary urgency, dysuria (pain or burning  
151 while urinating), and hematuria (blood in the urine). Patients reported the presence of the  
152 following complicated UTI symptoms: an oral temperature greater than 99.5 °F; new onset of  
153 nausea and/or vomiting; new onset of feelings of general achiness/feeling unwell; back,  
154 abdominal, side, or groin pain; international travel within the past 6 months; and dehydration  
155 within the past 2 to 3 weeks [5,27,28]. Patients identified the presence of any vaginal infection  
156 symptoms: green, yellow, clear, or white discharge; odor from urine/discharge; and vaginal  
157 itching, blisters, lesions, or rash. Patients were grouped into 3 categories according to their  
158 reported symptom presentation: uncomplicated UTI symptoms, complicated UTI symptoms, and

159 other (see Table 1). Appointments for recurrent infection (i.e., at least 2 appointments in 6  
 160 months, aside from relapse, or at least 3 appointments in 12 months, aside from relapse) were  
 161 considered a complicated UTI, as long as the patient reported UTI symptoms (even if the patient  
 162 had reported only symptoms of uncomplicated UTI during their recurrent visits) [19]. The  
 163 presence or absence of vaginal symptoms was also assessed.

164

165 **Table 1. Symptom groups and descriptions.**

| Symptom Group                    | Description                                                                                                                                                                                                                                                                                                                                                                                                                                                                                                                                                                                     | N (%)<br>(N=51,474) |
|----------------------------------|-------------------------------------------------------------------------------------------------------------------------------------------------------------------------------------------------------------------------------------------------------------------------------------------------------------------------------------------------------------------------------------------------------------------------------------------------------------------------------------------------------------------------------------------------------------------------------------------------|---------------------|
| Uncomplicated UTI <sup>1,3</sup> | <ul style="list-style-type: none"> <li>● Patients reporting <math>\geq 2</math> of the 4 UTI symptoms, with or without symptoms of vaginal infection</li> <li>● Not a recurrent infection (first infection in 6 months, or <math>&lt; 3</math> infections in 12 months)</li> </ul>                                                                                                                                                                                                                                                                                                              | 31,730 (61.6)       |
| Complicated UTI <sup>2,3</sup>   | <ul style="list-style-type: none"> <li>● Patients who reported <math>\geq 1</math> of the 4 UTI symptoms AND <math>\geq 1</math> symptom of complicated infection, with or without symptoms of vaginal infection (regardless of recurrent infection)</li> </ul> <p style="text-align: center;">OR</p> <ul style="list-style-type: none"> <li>● Any patient with recurrent infection (<math>\geq 2</math> infections in 6 months or <math>\geq 3</math> infections in 12 months) with or without symptoms of vaginal infection (regardless of having only uncomplicated UTI symptoms)</li> </ul> | 18,788 (36.5)       |
| Other <sup>3</sup>               | <ul style="list-style-type: none"> <li>● Patients reporting <math>\leq 1</math> of the 4 UTI symptoms, without symptoms of complicated infection, with or without symptoms of vaginal infection</li> <li>● Patients reporting none of the 4 UTI symptoms with <math>\leq 1</math> of the complicated infection symptoms, with or without symptoms of vaginal infection</li> <li>● Regardless of recurrent infection</li> </ul>                                                                                                                                                                  | 956 (1.9)           |

166 UTI, urinary tract infection.

167 <sup>1</sup>Uncomplicated UTI symptoms consisted of urinary frequency, urinary urgency, dysuria, and  
 168 hematuria.

169 <sup>2</sup>Complicated UTI symptoms consisted of an oral temperature greater than 99.5 °F; new onset of  
 170 nausea and/or vomiting; new onset of feelings of general achiness/not feeling well; back,  
 171 abdominal, side, or groin pain; international travel within the past 6 months; and dehydration  
 172 within the past 2–3 weeks.

173 <sup>3</sup>Symptoms of vaginal infections consisted of green, yellow, clear, or white discharge; odor from  
 174 urine or discharge; and vaginal itching, blisters, lesions, or rash.



175

176           *Prescription use and antibiotic type.* Prescription use and antibiotic type were measured  
177 by analyzing the number of appointments that resulted in prescriptions and the type and number  
178 of medications that were prescribed. A standard clinical protocol was developed based on  
179 guidelines for uncomplicated UTIs; thus, the recommended antibiotics were nitrofurantoin,  
180 trimethoprim-sulfamethoxazole, and fosfomycin (see S1 Appendix) [18,22,26]. No standardized  
181 protocol was developed for complicated UTIs and/or symptoms of vaginal infection. Physicians  
182 were permitted to manage these cases according to their evaluation and discretion. However,  
183 specific population-guided protocols were developed (e.g., for women older than 65 years,  
184 patients with dual infections).

185           *Symptom resolution.* Patients received a survey 7 days after their appointment asking  
186 them to indicate whether their symptoms had resolved.

187           *Treatment failure and relapse.* Appointments that occurred within 30 days after an initial  
188 appointment were considered follow-up visits and reported as treatment failure or relapse. These  
189 visits were excluded from the original analyses and were instead reported as outcomes of the  
190 initial appointment. Due to insufficient data (e.g., it is unclear if most patients experienced any  
191 symptom resolution between appointments), treatment failure and relapse were reported together  
192 because these groups were indistinguishable.

193

194           *Statistical methods*

195 Descriptive statistics were used to summarize the study sample, including frequencies, means,  
196 SDs, medians, and IQRs. Specifically, data were presented to examine prescription use and  
197 symptom resolution by age and US census region, as well as by grouping those with

198 uncomplicated UTIs, complicated UTIs, and symptoms of vaginal infection. Number of  
199 prescriptions received, type of prescription, symptom resolution, and number of treatment  
200 failures/relapses by symptom profile category were also assessed. Symptom resolution rates were  
201 compared, using chi-square tests, between the complicated and uncomplicated UTI symptom  
202 groups and between all women who received a prescription medication with symptom resolution  
203 among 8 comparator studies, for a total of 9 tests [14,29-35]. Bonferroni correction was used to  
204 account for multiple tests, and p-values <0.005 were considered significant. All descriptive  
205 statistics and chi-square tests were calculated in R (version 4.0.5) for Macintosh.

206

## 207 **Results**

208 The analysis set (n=51,474) included data from appointments with patients between the ages of  
209 18 and 84 years (mean=39.4, SD=14.7). Most patients were between the ages of 22 to 46 years  
210 (n=30,423, 59.1%), and the South census geographic region had the greatest number of patients  
211 (n=20,172, 39.2%; see Table 2).

212

213 **Table 2. Patient characteristics.<sup>1</sup>**

| <b>Characteristics</b>                 | <b>N (%)<br/>(N=51,474)</b> |
|----------------------------------------|-----------------------------|
| Age (years)                            |                             |
| 18–21                                  | 3,791 (7.4)                 |
| 22–45                                  | 30,423 (59.1)               |
| 46–65                                  | 14,449 (28.1)               |
| ≥66                                    | 2,811 (5.5)                 |
| Region (US Census Region) <sup>2</sup> |                             |
| South                                  | 20,172 (39.2)               |
| West                                   | 17,851 (34.7)               |
| Midwest                                | 9,970 (19.4)                |

|           |             |
|-----------|-------------|
| Northeast | 3,481 (6.8) |
|-----------|-------------|

214 <sup>1</sup>Raw data counts by age and geographic region for each appointment. Individuals who used the  
215 program multiple times appear more than once in this table.

216 <sup>2</sup>Regions were determined via the US Census regions. West: Alaska, Arizona, California,  
217 Colorado, Hawaii, Idaho, Montana, Nevada, New Mexico, Oregon, Utah, Washington,  
218 Wyoming. Northeast: Connecticut, Maine, Massachusetts, New Hampshire, New Jersey, New  
219 York, Pennsylvania, Rhode Island, Vermont. Midwest: Illinois, Indiana, Iowa, Kansas,  
220 Michigan, Minnesota, Missouri, Nebraska, North Dakota, Ohio, South Dakota, Wisconsin.  
221 South: Alabama, Arkansas, Delaware, District of Columbia, Florida, Georgia, Kentucky,  
222 Louisiana, Maryland, Mississippi, North Carolina, Oklahoma, South Carolina, Tennessee, Texas,  
223 Virginia, West Virginia.

224

### 225 *Symptom presentation*

226 Overall, symptom prevalence was high for urinary frequency (n=48,574, 94.4%), urinary  
227 urgency (n=48,662, 94.5%), and dysuria (n=50,244, 97.6%), while fewer patients reported  
228 hematuria (n=8,381, 16.3%). The majority of appointments (n=31,730, 61.6%) consisted of  
229 patients with uncomplicated UTI symptoms, but a substantial number (n=18,788, 36.5%)  
230 reported complicated UTI symptoms (see Table 1). The remaining appointments (n=956, 1.9%)  
231 consisted of patients in the other symptoms group. In total, 9,894 (19.2%) reported at least 1  
232 symptom of vaginal infection: 5,142 (16.2%) in the uncomplicated UTI symptoms group, 4,618  
233 (24.6%) in the complicated UTI symptoms group, and 134 (14.0%) in the other symptoms group.

234

### 235 *Prescription use and antibiotic choice*

236 Patients from 50,826 (98.7%) appointments received at least 1 prescription, with 2,818 (5.5%)  
237 receiving more than 1 prescription. Patients from 44,304 (86.1%) appointments received 1  
238 antibiotic, 2,320 (4.5%) received at least 1 antibiotic and an additional medication (e.g.,  
239 phenazopyridine or fluconazole), 498 (1.0%) received 2 or more antibiotics without an additional

240 medication, and 5 (<0.01%) received 1 or more other medications without an antibiotic.

241 Prescription data were unavailable for 3,966 (7.7%) patient appointments on the platform.

242 Overall, clinical protocol adherence to recommended prescribing patterns was high  
243 (n=43,932, 94.0%), and patients were most likely to receive prescriptions for antibiotics that  
244 were recommended in the clinical protocol (see Table 3). This pattern was consistent across  
245 patient groups: uncomplicated UTI symptoms (n=27,128, 94.4%), complicated UTI symptoms  
246 (n=16,070, 93.7%), and other symptoms group (n=772, 88.0%). Most women who reported at  
247 least 1 vaginal symptom, in addition to UTI symptoms, received a recommended antibiotic  
248 (n=8,396, 84.9%).

249 **Table 3. Symptom groups and prescription counts.**

| Symptom Group                        | Received a Prescription <sup>1</sup><br>N (%) | Unknown Prescription <sup>2</sup><br>N (%) | Received Antibiotic<br>N (%) <sup>3</sup> | Received “Recommended”<br>Antibiotic<br>N (%) <sup>4</sup> | Nitrofurantoin<br>N (%) <sup>5</sup> | TMP-SMX<br>N (%) <sup>5</sup> | Fosfomycin<br>N (%) <sup>5</sup> | Ciprofloxacin<br>(Regular or XR)<br>N (%) <sup>5, 6</sup> |
|--------------------------------------|-----------------------------------------------|--------------------------------------------|-------------------------------------------|------------------------------------------------------------|--------------------------------------|-------------------------------|----------------------------------|-----------------------------------------------------------|
| Total<br>N=51,474<br>(100%)          | 50,826 (98.7)                                 | 3,699 (7.2)                                | 46,754 (92.0)                             | 43,932 (94.0)                                              | 24,581 (52.6)                        | 19,404 (41.5)                 | 23 (0.0)                         | 2,431 (5.2)                                               |
| UTI<br>N=50,518<br>(98.1%)           | 49,903 (98.8)                                 | 3,657 (7.2)                                | 45,877 (91.9)                             | 43,160 (94.1)                                              | 24,200 (52.7)                        | 19,010 (41.4)                 | 23 (0.0)                         | 2,346 (5.1)                                               |
| Uncomplicated<br>N=31,730<br>(62.8%) | 31,431 (99.1)                                 | 2,471 (7.8)                                | 28,727 (91.4)                             | 27,128 (94.4)                                              | 15,235 (53.0)                        | 11,913 (41.5)                 | 15 (0.0)                         | 1,402 (4.9)                                               |
| Complicated<br>N=18,788<br>(37.2%)   | 18,472 (98.3)                                 | 1,186 (6.3)                                | 17,150 (94.8)                             | 16,070 (93.7)                                              | 8,965 (52.3)                         | 7,097 (41.4)                  | 8 (0.0)                          | 944 (5.5)                                                 |
| Other<br>N=965<br>(1.9%)             | 923 (95.6)                                    | 42 (4.4)                                   | 877 (95.0)                                | 772 (88.0)                                                 | 381 (43.4)                           | 394 (44.9)                    | 0 (0.0)                          | 85 (9.7)                                                  |

250 TMP-SMX, trimethoprim-sulfamethoxazole; UTI, urinary tract infection; XR, extended-release.

251 <sup>1</sup>Patients who received >1 prescription are only included once in this column.

252 <sup>2</sup>Some patients received a prescription, but there was no information about the prescription available in the dataset.

253 <sup>3</sup>Percentage represents the number of patients who received  $\geq 1$  antibiotics out of the total number who received a prescription. Patients  
254 who received >1 type of antibiotic are only included once.

255 <sup>4</sup>A recommended antibiotic is defined by the clinical protocol, not by the patient’s self-reported symptoms, and include nitrofurantoin,  
256 TMP-SMX, and fosfomycin. The percentage represents the number of patients who received a recommended antibiotic out of the total

257 number who received an antibiotic prescription. Note that 76 people received a prescription for nitrofurantoin and TMP-SMX; they  
258 are only listed once in this column.

259 <sup>5</sup>The percentages represent the number of patients who received that prescription out of the number of patients who received an  
260 antibiotic.

261 <sup>6</sup>Ciprofloxacin was an alternative regimen in the clinical protocol.

262

263

264 *Symptom resolution*

265 Symptom resolution data from the 7-day follow-up survey were available for 3,541 women,  
 266 including 2,193 women in the uncomplicated UTI group, 1,241 women in the complicated UTI  
 267 group, and 107 women in the other symptoms group. Across all groups, 99.4% of patients  
 268 (n=3,521) received a prescription, and the majority of these patients reported 7-day symptom  
 269 resolution (89.7%, n=3,160) compared with less than half of patients who did not receive a  
 270 prescription (40.0%, n=8; see Table 4). The symptom resolution rate in the complicated UTI  
 271 group was lower than that of the uncomplicated UTI group; however, this difference was not  
 272 significant (see Fig 2). Among those with a UTI and at least one symptom of vaginal infection,  
 273 the symptom resolution rates were similar for those with uncomplicated UTIs (86.2%) and  
 274 complicated UTIs (85.5%). Across all groups, the symptom resolution rate among patients who  
 275 received a prescription within this study was significantly higher than 4 of the 8 comparator  
 276 studies ( $\chi^2 = 20.0-374.1, p < 0.001$ ), significantly lower than 1 study ( $\chi^2 = 11.9, p < 0.001$ ), and  
 277 not significantly different from the remaining 3 studies (see Fig 2).

278

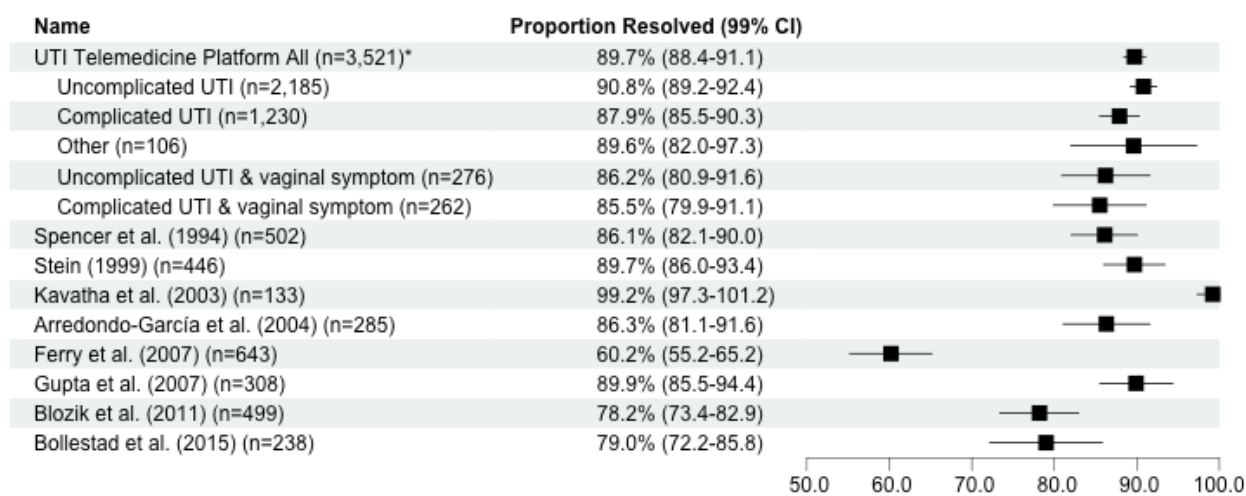

279 **Fig 2.** Forest plot of symptom resolution rates and 99% confidence intervals among all  
 280 consultations, by UTI symptom group, and 8 previous studies' reported rates. \*\*"UTI  
 281 Telemedicine Platform All" refers to all consultations with associated 7-day follow-up symptom  
 282

283 resolution data from the current study, followed by each symptom category. Among the  
 284 comparator studies, symptom resolution was measured on different days, including the  
 285 following: 3 days [35], 4 days [14], 4 to 7 days [31], 5 to 9 days [32,34], 7 days [30], 8 to 10  
 286 days [33], and 9 to 15 days [29]. Of the 8 comparator studies, 7 used in-person standard-of-care  
 287 [14,29-34] and 1 used telemedicine services [35]. If the comparator study was a clinical trial with  
 288 a control group, then symptom resolution rates were only compared with treatment groups who  
 289 received antibiotics [14].  
 290

291 **Table 4. Symptom resolution stratified by symptom group and receiving a prescription or**  
 292 **not.<sup>1</sup>**

| Symptoms   | N (%)                                |          |                                    |          |                        |           |                                             |           |                                           |          |              |           |              |
|------------|--------------------------------------|----------|------------------------------------|----------|------------------------|-----------|---------------------------------------------|-----------|-------------------------------------------|----------|--------------|-----------|--------------|
|            | Uncomplicated UTI Symptoms (n=2,193) |          | Complicated UTI Symptoms (n=1,241) |          | Other Symptoms (n=107) |           | Uncomplicated UTI & Vaginal Symptom (n=276) |           | Complicated UTI & Vaginal Symptom (n=262) |          | Total        |           | Total        |
|            | Rx                                   | No Rx    | Rx                                 | No Rx    | Rx                     | No Rx     | Rx                                          | No Rx     | Rx                                        | No Rx    | Rx           | No Rx     |              |
| Resolved   | 1,984 (90.8)                         | 4 (50.0) | 1081 (87.9)                        | 4 (36.4) | 95 (89.6)              | 0 (0.0)   | 238 (86.5)                                  | 0 (0.0)   | 223 (86.4)                                | 1 (25.0) | 3,160 (89.7) | 8 (40.0)  | 3,168 (89.5) |
| Unresolved | 201 (9.2)                            | 4 (50.0) | 149 (12.1)                         | 7 (63.6) | 11 (10.4)              | 1 (100.0) | 37 (13.5)                                   | 1 (100.0) | 35 (13.6)                                 | 3 (75.0) | 361 (10.3)   | 12 (60.0) | 373 (10.5)   |
| Total      | 2,185                                | 8        | 1,230                              | 11       | 106                    | 1         | 275                                         | 1         | 258                                       | 4        | 3,521        | 20        | 3,541        |

293 Rx, prescription; UTI, urinary tract infection.

294 <sup>1</sup>“Rx” includes individuals who were prescribed any prescription medication.

295

296 *Treatment failure and relapse*

297 Overall, 1,156 (2.2%) patients returned to use the program within 30 days after their original

298 consultation: 264 patients (22.8%) returned within 7 days, 328 patients (28.4%) within 8 to 14

299 days, and 564 patients (48.8%) between 15 and 30 days after the initial appointment.

300



301 **Discussion**

302 To the authors' knowledge, this is the largest analysis of real-world data from a telemedicine  
303 service for treating UTIs to date. Data from 51,474 visits over 4 years indicated that patients  
304 from 98.1% of appointments self-reported at least 2 symptoms of uncomplicated or complicated  
305 UTIs, with dysuria being the most commonly reported symptom. More than half (52.4%) of the  
306 sample reported at least 1 symptom of complicated UTI or vaginal infection. Most appointments  
307 (98.7%) resulted in a prescription, and prescription use and type were similar regardless of  
308 patient-reported symptoms (uncomplicated UTI, complicated UTI, or vaginal infection). Most  
309 patients (94.0%) with available prescription data received antibiotics that were recommended in  
310 the protocol (nitrofurantoin, trimethoprim-sulfamethoxazole, and fosfomycin).

311       Of patients with available follow-up survey data, 89.5% reported symptom resolution,  
312 and resolution rates were similar between uncomplicated and complicated UTI groups.  
313 Furthermore, the symptom resolution rate across all UTI categories was similar to previous  
314 research on UTI telemedicine programs evaluating only uncomplicated UTI patients. Only 2.2%  
315 of patients returned to the program within 30 days after an initial appointment, suggesting low  
316 treatment failure and relapse rates. Resolution rates among uncomplicated and complicated UTIs  
317 were also similar to, or better than, previous reports of in-person standard of care (see Fig 2).  
318 Taken together, this analysis demonstrates the effectiveness of large-scale UTI telemedicine  
319 programs and extends those observations to include patients who self-report symptoms of  
320 complicated UTIs or vaginal infections. Although this study made no direct measurements  
321 regarding safety, a retrospective study evaluating the safety and efficacy of telemedicine  
322 management of uncomplicated UTIs in 526 women reported that teleprescription of antibiotics is  
323 as safe as prescriptions initiated during in-person consultations [35]. Overall, 78% of patients

324 reported complete symptom resolution 3 days following teleconsultation, while 14% reported a  
325 decrease in uncomplicated UTI symptoms. Four percent reported deterioration, such as increased  
326 pain, flank pain, or fever, and 5% reported antibiotic adverse effects [35].

327         Previous research has reported that women perform well at self-diagnosing UTIs [36].  
328 Despite self-reporting symptoms of complicated UTIs or vaginal infections, these data support  
329 the notion that the women using this telemedicine program were accurately able to self-identify  
330 that they had a UTI. Furthermore, through discussions with physicians, these patients may have  
331 clarified the presence and severity of complicated UTIs or vaginal symptoms, which may have  
332 emboldened physicians to provide care for women who self-reported these symptoms at intake.  
333 Women who self-reported complicated UTI and vaginal symptoms had similar resolution rates  
334 compared with those who reported uncomplicated UTIs symptoms. Thus, these data suggest that  
335 a telemedicine approach to identification and treatment of more complicated UTIs and vaginal  
336 symptoms may be effective. Further work to determine appropriate sub-grouping and  
337 standardized protocols for these conditions is likely warranted. Of note, if the program had  
338 excluded patients who reported complicated UTI or symptoms of vaginal infection, 24,064  
339 women (approximately half of the sample) would have required in-person care, either through  
340 primary care, urgent care, or emergency department visits.

341         At scale, telemedicine programs that include uncomplicated and complicated UTIs could  
342 be a complementary offering at primary care clinics. This complementary service may result in  
343 reduced provider burdens within those settings, as well as within urgent care or emergency  
344 departments, freeing up valuable resources, without compromising quality of care or resolution  
345 rates. Undeniably, telemedicine access for UTI assessment and treatment can lessen the patient  
346 burden of in-person care. Future studies may identify the most effective protocols for integrating

347 such services into the existing primary care setting, or even into urgent care centers and  
348 emergency departments.

349 Another noteworthy outcome of this analysis was that telemedicine physician adherence  
350 to recommended antibiotic protocols was higher than previously reported, according to  
351 concordance with the Infectious Diseases Society of America guidelines for antibiotics to treat  
352 UTIs [37,38]. The telemedicine physicians in this sample were adherent to these guidelines for  
353 94.0% of appointments that resulted in antibiotic prescriptions. This high adherence rate may  
354 have been due to the implementation of the protocol and ease of use [39]. Moreover, provider  
355 prescribing practices were regularly audited to assure compliance. The recommended antibiotics  
356 in the clinical protocol were based on the guidelines for patients with uncomplicated UTIs  
357 [26,40]. Although not detailed in the current clinical protocol, the recommended antibiotic  
358 regimens may differ for patients exhibiting symptoms of pyelonephritis or complicated infection  
359 [40]. Telemedicine programs that allow for patients with symptoms of complicated UTIs or  
360 vaginal infections to receive appointments should include specific instructions for assessing the  
361 severity of the infection, the potential need for STI testing, and other medications that should be  
362 considered if a UTI diagnosis is not suspected.

363

#### 364 *Limitations*

365 As with all real-world evidence, the data used in this analysis were limited by what was collected  
366 through the clinical program. The present analysis relied on inferred diagnosis determined from  
367 digital responses and patient-reported symptoms at intake. Diagnoses made during treatment  
368 consultations were not obtained. As telemedicine programs become more ubiquitous,  
369 incorporating post-encounter diagnosis codes would provide greater granularity and

370 understanding of treatment patterns and outcomes, particularly for those with more complicated  
371 cases or other symptoms that may be addressed as part of the telemedicine encounter. Integrating  
372 these types of programs into electronic health records diagnosis information would allow  
373 researchers to identify patients who inaccurately report their symptoms. Future work is needed to  
374 determine discrepancies between patient-reported symptoms on intake and physicians' diagnoses  
375 based on direct patient encounters. This knowledge would help to expand clinical protocols to  
376 include guidance for determining the risk levels and appropriate next steps for patients who  
377 report symptoms of complicated UTI or vaginal infection.

378         The current analysis evaluated symptom resolution data for a total of 3,541 appointments,  
379 representing only 6.9% of the population. Although this still represents a large cohort in both the  
380 uncomplicated and complicated UTI groups, we can only speculate a similar rate of symptom  
381 resolution over the entire sample population. Notably, patients who did not experience symptom  
382 resolution were offered additional care, including referral to in-person care, and as such no  
383 symptom resolution data may have been available. A small percentage of patients (2.2%)  
384 returned to use the program within 30 days after the initial consultation, suggesting that most  
385 patients experienced a full recovery or sought in-person/other care, a feature this analysis cannot  
386 resolve. Patient follow-up data are needed to better understand symptom resolution when using  
387 direct-to-consumer telemedicine services. Future research may provide insight into how to  
388 ensure patients self-report symptom resolution, or perhaps, how data from electronic health  
389 records may be used to assess follow-up engagement with in-person care services.

390

391 **Conclusion**

392 Telemedicine services make it easier and faster for patients to receive treatment for UTIs by  
393 eliminating travel and waiting time at emergency rooms. This analysis demonstrates that  
394 telemedicine programs are an effective and scalable option for treatment of UTIs, even for  
395 women who self-report symptoms of complicated UTIs or vaginal infection. Most patients in the  
396 program exhibited symptoms of uncomplicated or complicated UTIs. Of those patients with  
397 available follow-up data, most experienced symptom resolution within 7 days after their  
398 appointment. Implementing and scaling UTI telemedicine programs and including women who  
399 self-report symptoms of complicated UTI or vaginal infection can reduce the burden on urgent  
400 care facilities and emergency departments, without compromising on the quality of care.

401

402

403 **Acknowledgments**

404 The authors would like to acknowledge the following people who developed and managed the  
405 telemedicine program evaluated in this study: Yvette Gaudreau, Lara Goorland, Anthony  
406 Dearman, Gabe Gaviola, Adina Schwartz, Jennifer Jing, Emily Miller, and Doug Elwood.  
407 Additionally, writing support was provided by Virgo Health.

408

409

410 **Competing Interests**

411 Natalie Daumeyer, Daniel Kreitzberg, Kathleen Gavin, and Timothy Bauer were all employees  
412 of Everly Health, Inc. at the time this analysis was conducted.

413

414

## References

- 415 1. Schappert SM, Rechtsteiner EA. Ambulatory medical care utilization estimates for 2007.  
416 Vital Health Stat 13. 2011;(169):1-38.
- 417 2. Chou SC, Baker O, Schuur JD. Changes in emergency department care intensity from  
418 2007-16: analysis of the National Hospital Ambulatory Medical Care survey. West J Emerg  
419 Med. 2020;21(2):209-216. doi:10.5811/westjem.2019.10.43497.
- 420 3. Stein JC, Navab B, Frazee B, Tebb K, Hendey G, Maselli J, et al. A randomized trial of  
421 computer kiosk-expedited management of cystitis in the emergency department. Acad Emerg  
422 Med. 2011;18(10):1053-1059. doi:10.1111/j.1553-2712.2011.01167.x.
- 423 4. Bashshur RL, Reardon TG, Shannon GW. Telemedicine: a new health care delivery  
424 system. Annu Rev Public Health. 2000;21:613-637. doi:10.1146/annurev.publhealth.21.1.613.
- 425 5. Bono MJ, Leslie SW, Reygaert WC. Urinary tract infection. In: StatPearls [Internet].  
426 Treasure Island (FL): StatPearls Publishing; 2022.
- 427 6. Taur Y, Smith MA. Adherence to the Infectious Diseases Society of America guidelines  
428 in the treatment of uncomplicated urinary tract infection. Clin Infect Dis. 2007;44(6):769-774.  
429 doi:10.1086/511866.
- 430 7. Foxman B. Urinary tract infection syndromes: occurrence, recurrence, bacteriology, risk  
431 factors, and disease burden. Infect Dis Clin North Am. 2014;28(1):1-13.  
432 doi:10.1016/j.idc.2013.09.003.
- 433 8. Ozturk T, Talo M, Yildirim EA, Baloglu UB, Yildirim O, Acharya UR. Automated  
434 detection of COVID-19 cases using deep neural networks with X-ray images. Comput Biol Med.  
435 2020;121:103792. doi:10.1016/j.combiomed.2020.103792.

- 436 9. Campbell J, Felver M, Kamarei S. ‘Telephone treatment’ of uncomplicated acute cystitis.  
437 Cleve Clin J Med. 1999;66(8):495-501. doi:10.3949/ccjm.66.8.495.
- 438 10. Saint S, Scholes D, Fihn SD, Farrell RG, Stamm WE. The effectiveness of a clinical  
439 practice guideline for the management of presumed uncomplicated urinary tract infection in  
440 women. Am J Med. 1999;106(6):636-641. doi:10.1016/s0002-9343(99)00122-9.
- 441 11. Barry HC, Hickner J, Ebell MH, Ettenhofer T. A randomized controlled trial of telephone  
442 management of suspected urinary tract infections in women. J Fam Pract. 2001;50(7):589-594.
- 443 12. Vinson DR, Quesenberry CP, Jr. The safety of telephone management of presumed  
444 cystitis in women. Arch Intern Med. 2004;164(9):1026-1029. doi:10.1001/archinte.164.9.1026.
- 445 13. Schauburger CW, Merkitich KW, Prell AM. Acute cystitis in women: experience with a  
446 telephone-based algorithm. WMJ. 2007;106(6):326-329.
- 447 14. Bollestad M, Grude N, Lindbaek M. A randomized controlled trial of a diagnostic  
448 algorithm for symptoms of uncomplicated cystitis at an out-of-hours service. Scand J Prim  
449 Health Care. 2015;33(2):57-64. doi:10.3109/02813432.2015.1041827.
- 450 15. Rastogi R, Martinez KA, Gupta N, Rood M, Rothberg MB. Management of urinary tract  
451 infections in direct to consumer telemedicine. J Gen Intern Med. 2020;35(3):643-648.  
452 doi:10.1007/s11606-019-05415-7.
- 453 16. Bent S, Nallamotheu BK, Simel DL, Fihn SD, Saint S. Does this woman have an acute  
454 uncomplicated urinary tract infection? JAMA. 2002;287(20):2701-2710.  
455 doi:10.1001/jama.287.20.2701.
- 456 17. Little P, Moore MV, Turner S, Rumsby K, Warner G, Lowes JA, et al. Effectiveness of  
457 five different approaches in management of urinary tract infection: randomised controlled trial.  
458 BMJ. 2010;340:c199. doi:10.1136/bmj.c199.



- 459 18. Gupta K, Grigoryan L, Trautner B. Urinary tract infection. *Ann Intern Med*.  
460 2017;167(7):ITC49-ITC64. doi:10.7326/aitc201710030.
- 461 19. Sabih A, Leslie SW. Complicated urinary tract infections. 2022 May 27. In: StatPearls  
462 [Internet]. Treasure Island (FL): StatPearls Publishing; 2022.
- 463 20. Smith WB, II, Kohlwes RJ. From leather bags to webcams, the emerging tools of tele-  
464 primary care. *J Gen Intern Med*. 2020;35(3):628-629. doi:10.1007/s11606-019-05603-5.
- 465 21. Giesen LGM, Cousins G, Dimitrov BD, van de Laar FA, Fahey T. Predicting acute  
466 uncomplicated urinary tract infection in women: a systematic review of the diagnostic accuracy  
467 of symptoms and signs. *BMC Fam Pract*. 2010;11:78. doi:10.1186/1471-2296-11-78.
- 468 22. Colgan R, Williams M. Diagnosis and treatment of acute uncomplicated cystitis. *Am*  
469 *Fam Physician*. 2011;84(7):771-776.
- 470 23. Garland SM, Tabrizi SN. Diagnosis of sexually transmitted infections (STI) using self-  
471 collected non-invasive specimens. *Sex Health*. 2004;1(2):121-126. doi:10.1071/sh03014.
- 472 24. Alidjanov JF, Naber KG, Abdufattaev UA, Pilatz A, Wagenlehner FM. Reliability of  
473 symptom-based diagnosis of uncomplicated cystitis. *Urol Int*. 2019;102(1):83-95.  
474 doi:10.1159/000493509.
- 475 25. Goebel MC, Trautner BW, Grigoryan L. The five Ds of outpatient antibiotic stewardship  
476 for urinary tract infections. *Clin Microbiol Rev*. 2021;34(4):e0000320. doi:10.1128/cmr.00003-  
477 20.
- 478 26. Grigoryan L, Trautner BW, Gupta K. Diagnosis and management of urinary tract  
479 infections in the outpatient setting: a review. *JAMA*. 2014;312(16):1677-1684.  
480 doi:10.1001/jama.2014.12842.

- 481 27. U.S. Department of Health and Human Services. Complicated urinary tract infections:  
482 developing drugs for treatment. Guidance for industry. 2018. Available at  
483 [https://www.fda.gov/regulatory-information/search-fda-guidance-documents/complicated-](https://www.fda.gov/regulatory-information/search-fda-guidance-documents/complicated-urinary-tract-infections-developing-drugs-treatment)  
484 [urinary-tract-infections-developing-drugs-treatment](https://www.fda.gov/regulatory-information/search-fda-guidance-documents/complicated-urinary-tract-infections-developing-drugs-treatment). Accessed on April 20, 2022.
- 485 28. Belyayeva M, Jeong JM. Acute pyelonephritis. 2022 Jul 5. In: StatPearls [Internet].  
486 Treasure Island (FL): StatPearls Publishing; 2022.
- 487 29. Spencer RC, Moseley DJ, Greensmith MJ. Nitrofurantoin modified release versus  
488 trimethoprim or co-trimoxazole in the treatment of uncomplicated urinary tract infection in  
489 general practice. *J Antimicrob Chemother.* 1994;33 Suppl A:121-129.  
490 doi:10.1093/jac/33.suppl\_a.121.
- 491 30. Stein GE. Comparison of single-dose fosfomycin and a 7-day course of nitrofurantoin in  
492 female patients with uncomplicated urinary tract infection. *Clin Ther.* 1999;21(11):1864-1872.  
493 doi:10.1016/s0149-2918(00)86734-x.
- 494 31. Kavatha D, Giamarellou H, Alexiou Z, Vlachogiannis N, Pentea S, Gozadinos T, et al.  
495 Cefpodoxime-proxetil versus trimethoprim-sulfamethoxazole for short-term therapy of  
496 uncomplicated acute cystitis in women. *Antimicrob Agents Chemother.* 2003;47(3):897-900.  
497 doi:10.1128/aac.47.3.897-900.2003.
- 498 32. Arredondo-García JL, Figueroa-Damián R, Rosas A, Jáuregui A, Corral M, Costa A, et  
499 al. Comparison of short-term treatment regimen of ciprofloxacin versus long-term treatment  
500 regimens of trimethoprim/sulfamethoxazole or norfloxacin for uncomplicated lower urinary tract  
501 infections: a randomized, multicentre, open-label, prospective study. *J Antimicrob Chemother.*  
502 2004;54(4):840-843. doi:10.1093/jac/dkh414.

- 503 33. Ferry SA, Holm SE, Stenlund H, Lundholm R, Monsen TJ. Clinical and bacteriological  
504 outcome of different doses and duration of pivmecillinam compared with placebo therapy of  
505 uncomplicated lower urinary tract infection in women: the LUTIW project. *Scand J Prim Health*  
506 *Care*. 2007;25(1):49-57. doi:10.1080/02813430601183074.
- 507 34. Gupta K, Hooton TM, Roberts PL, Stamm WE. Short-course nitrofurantoin for the  
508 treatment of acute uncomplicated cystitis in women. *Arch Intern Med*. 2007;167(20):2207-2212.  
509 doi:10.1001/archinte.167.20.2207.
- 510 35. Blozik E, Sommer-Meyer C, Cerezo M, von Overbeck J. Effectiveness and safety of  
511 telemedical management in uncomplicated urinary tract infections. 2011;17(2):78-82.  
512 doi:10.1258/jtt.2010.100406.
- 513 36. Gupta K, Hooton TM, Roberts PL, Stamm WE. Patient-initiated treatment of  
514 uncomplicated recurrent urinary tract infections in young women. *Ann Intern Med*.  
515 2001;135(1):9-16. doi:10.7326/0003-4819-135-1-200107030-00004.
- 516 37. Zatorski C, Zocchi M, Cosgrove SE, Rand C, Brooks G, May L. A single center  
517 observational study on emergency department clinician non-adherence to clinical practice  
518 guidelines for treatment of uncomplicated urinary tract infections. *BMC Infect Dis*.  
519 2016;16(1):638. doi:10.1186/s12879-016-1972-6.
- 520 38. Grigoryan L, Zoorob R, Wang H, Trautner BW. Low concordance with guidelines for  
521 treatment of acute cystitis in primary care. *Open Forum Infect Dis*. 2015;2(4):ofv159.  
522 doi:10.1093/ofid/ofv159.
- 523 39. Grigoryan L, Nash S, Zoorob R, Germanos GJ, Horsfield MS, Khan FM, et al.  
524 Qualitative analysis of primary care provider prescribing decisions for urinary tract infections.  
525 *Antibiotics (Basel)*. 2019;8(2). doi:10.3390/antibiotics8020084.

526 40. Gupta K, Hooton TM, Naber KG, Wult B, Colgan R, Miller LG, et al. International  
527 clinical practice guidelines for the treatment of acute uncomplicated cystitis and pyelonephritis in  
528 women: a 2010 update by the Infectious Diseases Society of America and the European Society  
529 for Microbiology and Infectious Diseases. *Clin Infect Dis.* 2011;52(5):e103-e120.  
530 doi:10.1093/cid/ciq257.

531 **S1 Appendix: Prescription Information**

| <b>Recommended Regimens</b>                        |                                                                      |                                                   |
|----------------------------------------------------|----------------------------------------------------------------------|---------------------------------------------------|
| Nitrofurantoin<br>100 mg, twice per day for 5 days | Trimethoprim-sulfamethoxazole<br>160–800 mg twice per day for 3 days | Fosfomycin<br>3 g single dose                     |
| <b>Alternative Regimens</b>                        |                                                                      |                                                   |
| Ciprofloxacin*<br>250 mg twice per day for 3 days  | Ciprofloxacin extended release*<br>500 mg once per day for 3 days    | Levofloxacin*<br>250 mg once per day for 3 days   |
| Ofloxacin*<br>400 mg single dose                   | Amoxicillin-clavulanate†<br>500–125 mg twice per day for 3–7 days    | Cefpodoxime†<br>100 mg twice per day for 3–7 days |
| Cefdinir†<br>300 mg twice per day for 3–7 days     | Cefaclor†<br>250 mg or 500 mg 3 times per day for 3–7 days           | Cefadroxil†<br>500 mg twice per day for 3–7 days  |

532 \*Fluoroquinolones

533 †Beta lactams
